# Supplementary material for: A Multi-Omics Approach Reveals Enrichment in Metabolites Involved in the Regulation of the Glutathione Pathway in LIN28B-Dependent Cancer Cells
Source: MDPI journal article supplement (doi:10.3390/ijms25031602), 2024-01-27
Supplement: s1 [file s1]

**Supplementary Table S1.** Identified metabolites. HMDB is the Human Metabolome DataBase identifier, 'name' is the name of the metabolite, p is the p-value of the Mann-Whitney test, FC[CTRL/iLIN28B] is the fold change calculated as the ratio between the median of the metabo-lite concentration in the group 'CTRL' and that of the group 'iLIN28B'.

| HMDB        | name                      | p       | FC[CTRL/<br>iLIN28B] |
|-------------|---------------------------|---------|----------------------|
| HMDB0000062 | L-Carnitine               | 1.1E-05 | 1.07                 |
| HMDB0000148 | L-Glutamic acid           | 1.1E-04 | 1.15                 |
| HMDB0000159 | L-Phenylalanine           | 1.9E-02 | 1.03                 |
| HMDB0000172 | L-Isoleucine              | 2.5E-02 | 0.96                 |
| HMDB0000216 | Norepinephrine            | 3.9E-05 | 1.08                 |
| HMDB0000267 | Pyroglutamic acid         | 3.0E-04 | 1.03                 |
| HMDB0000289 | Uric acid                 | 3.6E-02 | 1.13                 |
| HMDB0000303 | Tryptamine                | 4.7E-03 | 1.10                 |
| HMDB0000306 | Tyramine                  | 3.7E-02 | 0.49                 |
| HMDB0000609 | DL-Dopa                   | 2.6E-05 | 1.09                 |
| HMDB0000641 | L-Glutamine               | 4.6E-06 | 1.13                 |
| HMDB0000687 | L-Leucine                 | 1.3E-02 | 0.95                 |
| HMDB0000696 | L-Methionine              | 1.8E-04 | 1.10                 |
| HMDB0000824 | Propionylcarnitine        | 5.2E-04 | 1.15                 |
| HMDB0000929 | L-Tryptophan              | 8.3E-03 | 1.06                 |
| HMDB0001476 | 3-Hydroxyanthranilic acid | 6.5E-07 | 2.76                 |
| HMDB0002013 | Butyrylcarnitine          | 1.7E-03 | 0.82                 |
| HMDB0002931 | N-Acetylserine            | 1.7E-04 | 1.17                 |
| HMDB0013128 | Valerylcarnitine          | 2.1E-05 | 1.74                 |
